# Supplementary material for: A Comprehensive Evaluation of Dioxins and Furans Occurrence in River Sediments from a Secondary Steel Recycling Craft Village in Northern Vietnam
Source: MDPI journal article supplement (doi:10.3390/molecules29081788), 2024-04-15
Supplement: s1 [file s1]

# Comprehensive evaluation of dioxins and furans occurrence in river sediments from a Secondary Steel Recycling craft village in northern Vietnam

Hung Xuan Nguyen <sup>1,2</sup>, Xuyen Thi Nguyen <sup>1,2</sup>, Hang Thi Hong Mai <sup>2,4</sup>, Huong Thi Nguyen <sup>2</sup>, Nam Duc Vu <sup>2</sup>, Thao Thi Phuong Pham <sup>2</sup>, Trung Quang Nguyen <sup>3</sup>, Dat Tien Nguyen <sup>2</sup>, Nam Thanh Duong <sup>2</sup>, Anh Le Tuan Hoang <sup>2</sup>, Tung Ngoc Nguyen <sup>2</sup>, Nhan Van Le <sup>2</sup>, Ha Viet Dao <sup>5</sup>, Minh Truong Ngoc <sup>2</sup>, Minh Quang Bui <sup>2,\*</sup>

<sup>1</sup> Faculty of Chemistry, Graduate University of Science and Technology, Vietnam Academy of Science and Technology, 18 Hoang Quoc Viet Street, Cau Giay, Hanoi 11353, Vietnam

<sup>2</sup> Center for High Technology Research and Development, Vietnam Academy of Science and Technology, 18 Hoang Quoc Viet Street, Cau Giay, Hanoi 11353, Vietnam

<sup>3</sup> Institute of Environmental Science and Public Health, 18 Hoang Quoc Viet Street, Cau Giay, Hanoi 11353, Vietnam

<sup>4</sup> Faculty of Chemistry, University of Natural Science, Hanoi National University, 19 Le Thanh Tong Street, Hoan Kiem, Hanoi, Vietnam

<sup>5</sup> Institute of Oceanography, 1 Cau Da Street, Nha Trang, Khanh Hoa, Vietnam

\* Correspondence: [bui\\_quang\\_minh@yahoo.com](mailto:bui_quang_minh@yahoo.com); Tel.: (+84)-985173286

**Citation:** Nguyen, H.X.; Nguyen, X.T.; Mai, H.T.H.; Nguyen, H.T.; Vu, N.D.; Pham, T.T.P.; Nguyen, T.Q.; Nguyen, D.T.; Duong, N.T.; Le Tuan Hoang, A.; et al. Comprehensive evaluation of dioxins and furans occurrence in river sediments from a Secondary Steel Recycling craft village in northern Vietnam.

*Molecules* **2024**, *29*, 1788.

<https://doi.org/10.3390/molecules29081788>

## Contents

Academic Editor(s): Name

Received: 12 March 2024

Revised: 7 April 2024

Accepted: 10 April 2024

Published: 15 April 2024

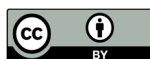

**Copyright:** © 2024 by the authors. Licensee MDPI, Basel, Switzerland. This article is an open access article distributed under the terms and conditions of the Creative Commons Attribution (CC BY) license (<https://creativecommons.org/licenses/by/4.0/>).

Table S1: Method detection limit of dioxins and furans in sediment

| Compound            | Method detection limit (ng/kg d.w) |
|---------------------|------------------------------------|
| 2,3,7,8-TCDD        | 0.031                              |
| 1,2,3,7,8-PeCDD     | 0.026                              |
| 1,2,3,4,7,8-HxCDD   | 0.112                              |
| 1,2,3,6,7,8-HxCDD   | 0.062                              |
| 1,2,3,7,8,9-HxCDD   | 0.060                              |
| 1,2,3,4,6,7,8-HpCDD | 0.181                              |
| OCDD                | 0.193                              |
| 2,3,7,8-TCDF        | 0.107                              |
| 1,2,3,7,8-PeCDF     | 0.062                              |
| 2,3,4,7,8-PeCDF     | 0.052                              |
| 1,2,3,4,7,8-HxCDF   | 0.056                              |
| 1,2,3,6,7,8-HxCDF   | 0.082                              |
| 1,2,3,7,8,9-HxCDF   | 0.133                              |
| 2,3,4,6,7,8-HxCDF   | 0.064                              |
| 1,2,3,4,6,7,8-HpCDF | 0.113                              |
| 1,2,3,4,7,8,9-HpCDF | 0.276                              |
| OCDF                | 0.199                              |

Table S2: The recovery efficiency (%) of  $^{13}\text{C}$  label compounds in blank and sediment samples

| Compounds                            | DH 1 | DH 2 | DH 3 | DH 4 | DH 5 | DH 6 | DH 7 | Blank |
|--------------------------------------|------|------|------|------|------|------|------|-------|
| $^{13}\text{C}$ -2,3,7,8-TCDD        | 64   | 54   | 49   | 61   | 60   | 42   | 60   | 67    |
| $^{13}\text{C}$ -2,3,7,8-TCDF        | 65   | 52   | 46   | 58   | 62   | 34   | 64   | 79    |
| $^{13}\text{C}$ -1,2,3,7,8-PeCDD     | 56   | 52   | 52   | 79   | 53   | 62   | 55   | 68    |
| $^{13}\text{C}$ -1,2,3,7,8-PeCDF     | 55   | 63   | 58   | 60   | 66   | 56   | 64   | 68    |
| $^{13}\text{C}$ -2,3,4,7,8-PeCDF     | 63   | 62   | 58   | 70   | 60   | 57   | 60   | 71    |
| $^{13}\text{C}$ -1,2,3,4,7,8-HxCDF   | 61   | 76   | 73   | 58   | 70   | 53   | 69   | 75    |
| $^{13}\text{C}$ -1,2,3,6,7,8-HxCDF   | 48   | 67   | 63   | 50   | 64   | 48   | 68   | 76    |
| $^{13}\text{C}$ -2,3,4,6,7,8-HxCDF   | 56   | 63   | 62   | 52   | 47   | 44   | 61   | 72    |
| $^{13}\text{C}$ -1,2,3,7,8,9-HxCDF   | 67   | 82   | 76   | 67   | 58   | 57   | 75   | 86    |
| $^{13}\text{C}$ -1,2,3,4,7,8-HxCDD   | 64   | 61   | 65   | 52   | 55   | 55   | 69   | 69    |
| $^{13}\text{C}$ -1,2,3,6,7,8-HxCDD   | 48   | 51   | 53   | 50   | 55   | 48   | 54   | 60    |
| $^{13}\text{C}$ -1,2,3,4,6,7,8-HpCDD | 59   | 63   | 63   | 62   | 65   | 57   | 87   | 59    |
| $^{13}\text{C}$ -1,2,3,4,6,7,8-HpCDF | 53   | 51   | 57   | 45   | 55   | 44   | 65   | 64    |
| $^{13}\text{C}$ -1,2,3,4,7,8,9-HpCDF | 77   | 81   | 79   | 60   | 72   | 60   | 50   | 75    |
| $^{13}\text{C}$ -OCDD                | 70   | 61   | 58   | 61   | 76   | 52   | 61   | 41    |

Table S3: The concentration of PCDD/Fs (ng/kg) in blank sample

| Compounds           | Blank sample |
|---------------------|--------------|
| 2,3,7,8-TCDD        | N.D.         |
| 1,2,3,7,8-PeCDD     | 0.008        |
| 1,2,3,4,7,8-HxCDD   | N.D.         |
| 1,2,3,6,7,8-HxCDD   | N.D.         |
| 1,2,3,7,8,9-HxCDD   | N.D.         |
| 1,2,3,4,6,7,8-HpCDD | N.D.         |
| OCDD                | 0.032        |
| 2,3,7,8-TCDF        | 0.038        |
| 1,2,3,7,8-PeCDF     | 0.024        |
| 2,3,4,7,8-PeCDF     | N.D.         |
| 1,2,3,4,7,8-HxCDF   | 0.014        |
| 1,2,3,6,7,8-HxCDF   | N.D.         |
| 1,2,3,7,8,9-HxCDF   | 0.006        |
| 2,3,4,6,7,8-HxCDF   | N.D.         |
| 1,2,3,4,6,7,8-HpCDF | 0.013        |
| 1,2,3,4,7,8,9-HpCDF | 0.007        |
| OCDF                | 0.079        |

N.D. = not detected

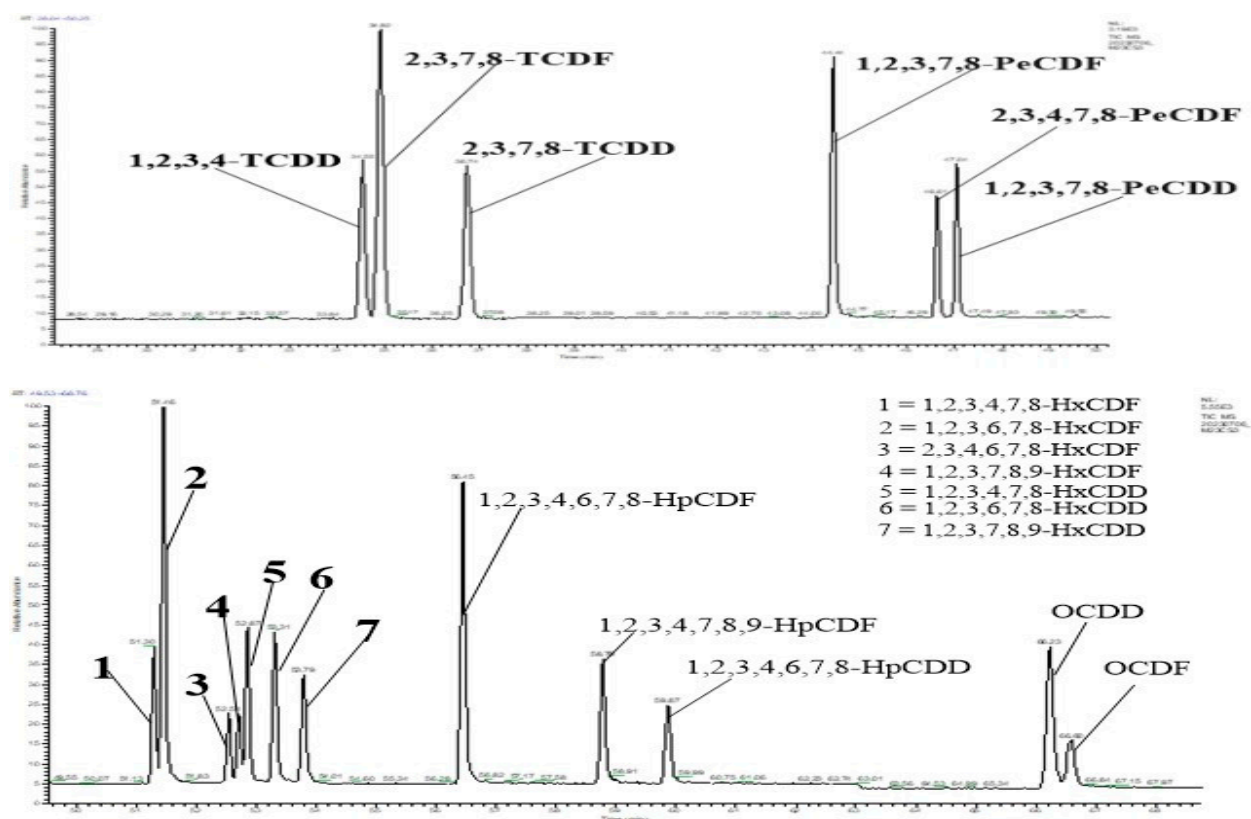

Figure S1: The total ion chromatography of PCDD/Fs

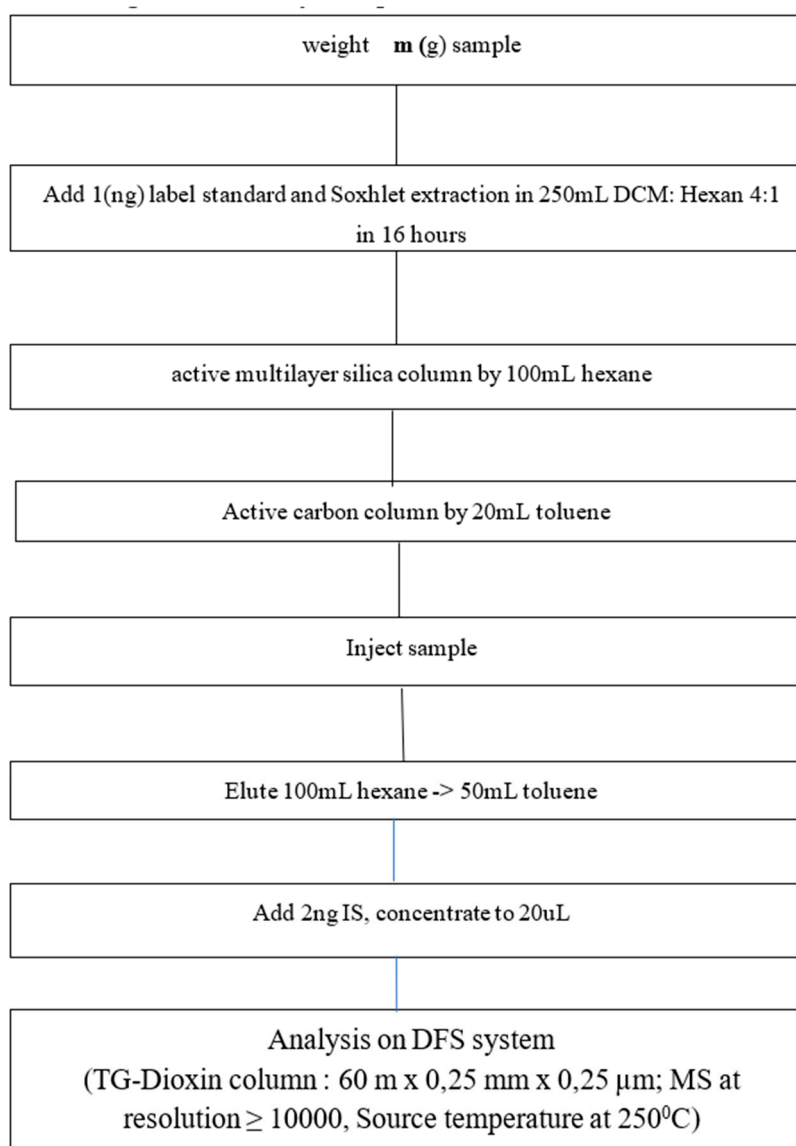

Figure S2. Dioxins and furans nalytical procedure by DFS system

MD20 Report Rev00\_10 January 2022

| Z-scores - SEDIMENT           |               |          |          |          |          |          |          |          |          |          |
|-------------------------------|---------------|----------|----------|----------|----------|----------|----------|----------|----------|----------|
|                               | Lab&replicate | Lab228-A | Lab228-B | Lab228-C | Lab227-A | Lab227-B | Lab227-C | Lab228-A | Lab228-B | Lab228-C |
| PCDD/F                        | GC/MS system  | High     | High     | High     | NA       | NA       | NA       | High     | High     | High     |
| 2,3,7,8-TeCDD                 |               | -2.06    | -2.63    | -1.92    | NA       | NA       | NA       | 0.22     | 0.66     | 0.79     |
| 1,2,3,7,8-PeCDD               |               | -1.47    | -1.56    | -1.34    | NA       | NA       | NA       | 0.48     | 0.28     | -0.10    |
| 1,2,3,4,7,8-HxCDD             |               | -1.57    | -1.86    | -1.57    | NA       | NA       | NA       | 0.28     | 0.00     | 0.37     |
| 1,2,3,6,7,8-HxCDD             |               | -1.57    | -1.41    | -1.25    | NA       | NA       | NA       | -0.38    | -0.79    | -0.79    |
| 1,2,3,7,8,9-HxCDD             |               | -1.25    | -1.33    | -1.23    | NA       | NA       | NA       | -0.28    | -0.42    | -0.73    |
| 1,2,3,4,6,7,8-HpCDD           |               | -1.56    | -1.51    | -1.65    | NA       | NA       | NA       | 0.02     | -0.43    | 0.65     |
| OCDD                          |               | -1.26    | -1.26    | -1.31    | NA       | NA       | NA       | 0.16     | -0.16    | 0.95     |
| 2,3,7,8-TeCDF                 |               | -1.71    | -1.76    | -1.56    | NA       | NA       | NA       | 0.66     | 0.00     | 0.01     |
| 1,2,3,7,8-PeCDF               |               | -1.50    | -1.52    | -1.36    | NA       | NA       | NA       | -0.20    | -0.43    | -0.24    |
| 2,3,4,7,8-PeCDF               |               | -0.48    | -0.46    | -0.28    | NA       | NA       | NA       | -0.36    | -0.60    | -0.63    |
| 1,2,3,4,7,8-HxCDF             |               | -1.44    | -1.52    | -1.35    | NA       | NA       | NA       | -0.15    | -0.30    | 0.07     |
| 1,2,3,6,7,8-HxCDF             |               | -1.56    | -1.51    | -1.21    | NA       | NA       | NA       | 0.36     | -0.02    | 0.16     |
| 1,2,3,7,8,9-HxCDF             |               | -0.35    | -0.36    | -0.25    | NA       | NA       | NA       | 0.94     | 0.89     | 0.97     |
| 2,3,4,6,7,8-HxCDF             |               | -0.98    | -1.03    | -0.94    | NA       | NA       | NA       | -0.30    | -0.52    | -0.49    |
| 1,2,3,4,6,7,8-HpCDF           |               | -1.33    | -1.36    | -1.32    | NA       | NA       | NA       | 0.02     | -0.10    | 0.06     |
| 1,2,3,4,7,8,9-HpCDF           |               | -1.42    | -1.48    | -1.49    | NA       | NA       | NA       | 0.04     | -0.02    | 0.07     |
| OCDF                          |               | -1.14    | -1.13    | -1.14    | NA       | NA       | NA       | 0.30     | 0.29     | 0.07     |
| TEQ (PCDD/F)                  |               | -4.46    | -4.58    | -3.93    | NA       | NA       | NA       | 0.17     | -0.69    | -0.20    |
| TEQ (PCDD/F) Upperbound (UpB) |               | -4.46    | -4.58    | -3.93    | NA       | NA       | NA       | 0.17     | -0.69    | -0.20    |

Figure S3: the result of the inter-laboratory testing program InterCinD IC10POP's ed 2022

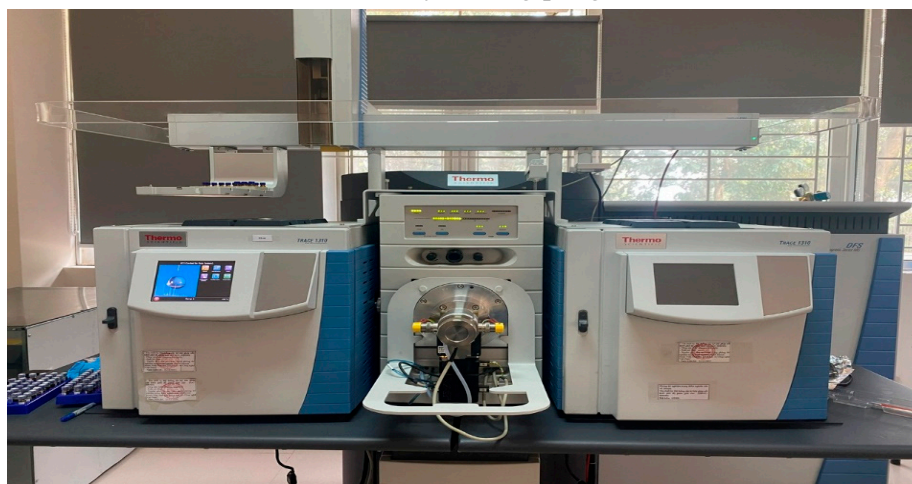

Figure S4. High-resolution gas chromatography coupled with high-resolution mass spectrometry system Model DFS Thermo-USA

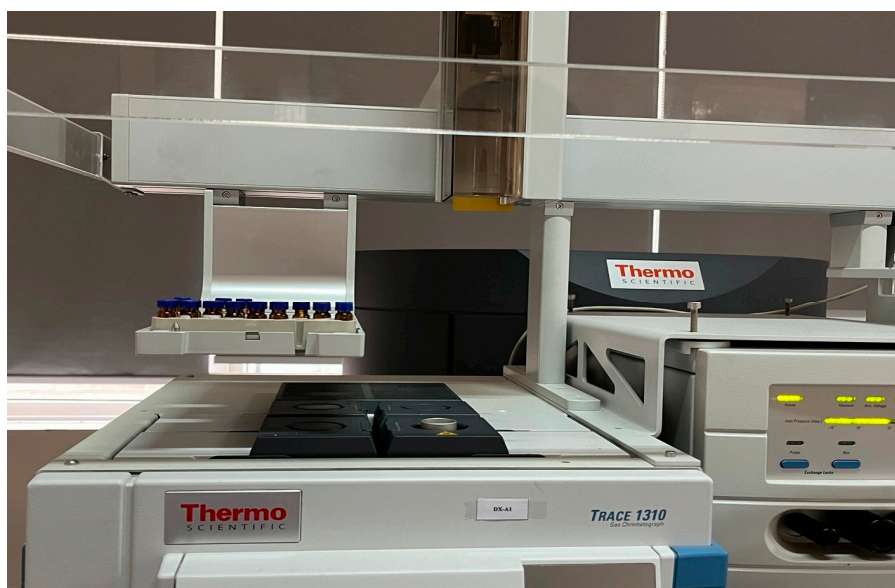

Figure S5. Final sample after processing transferred into an 150 $\mu$ l insert vial and placed in a 2ml dark vial

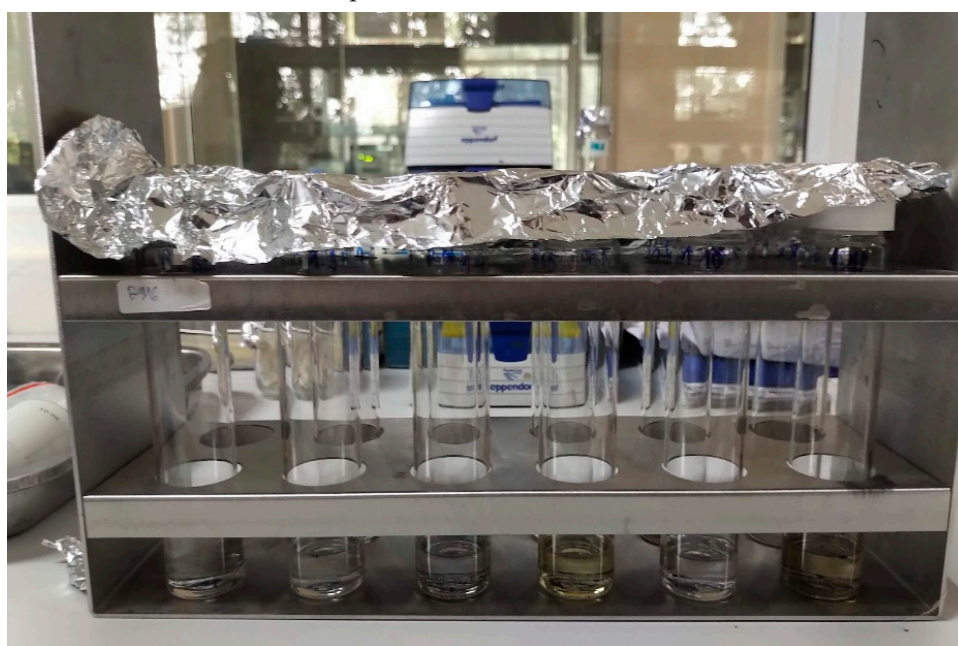

Figure S6: Sample after cleaning, removing impurities, transferred to a test tube for nitrogen gas blowing to remove all solvents, enriching the sample



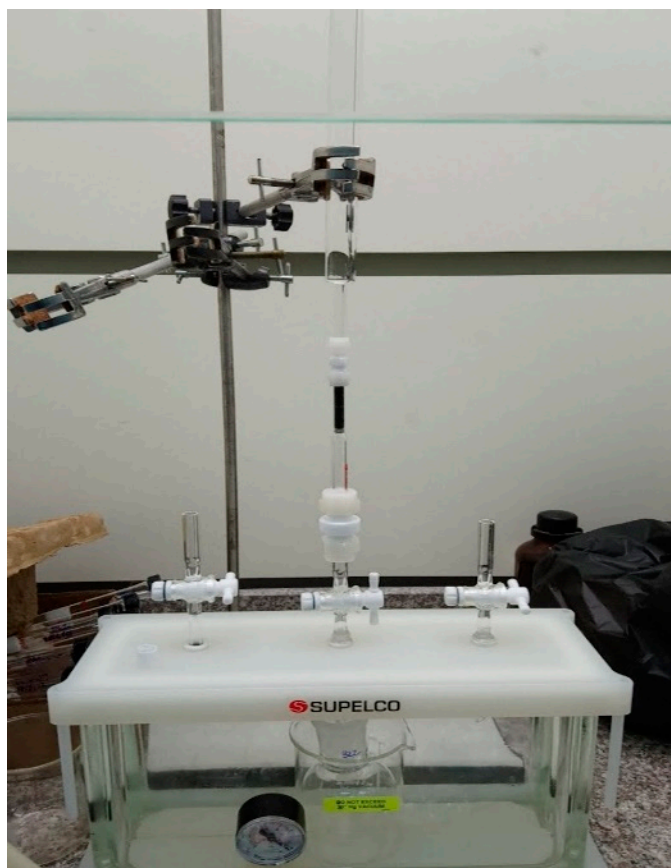

Figure S7: The sample after passing through the multilayer column is impregnated onto an activated carbon column, then washed to clean and remove interfering impurities.

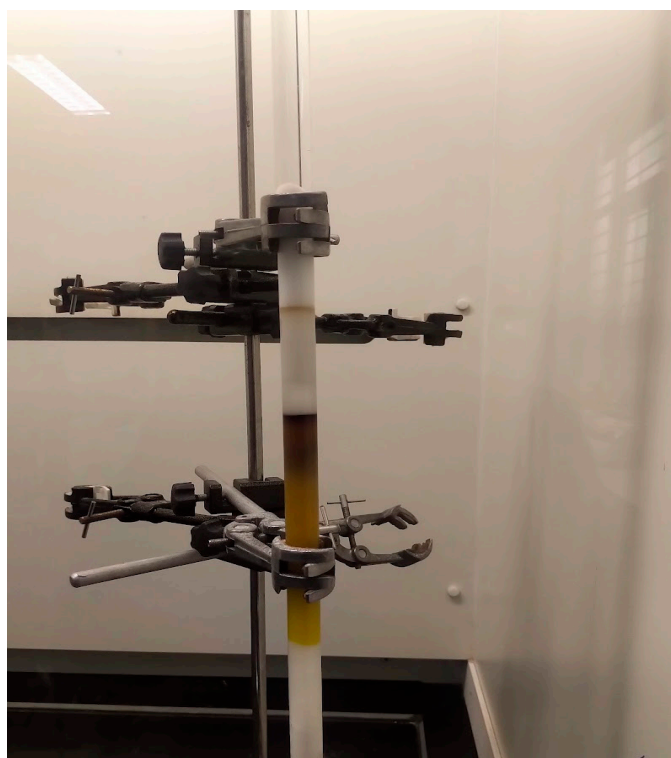

Figure S8: The sample after extraction contains many impurities, therefore it needs to be cleaned by impregnating onto a multilayer carbon column, then washed to remove dirt and interfere with the dioxin signal.



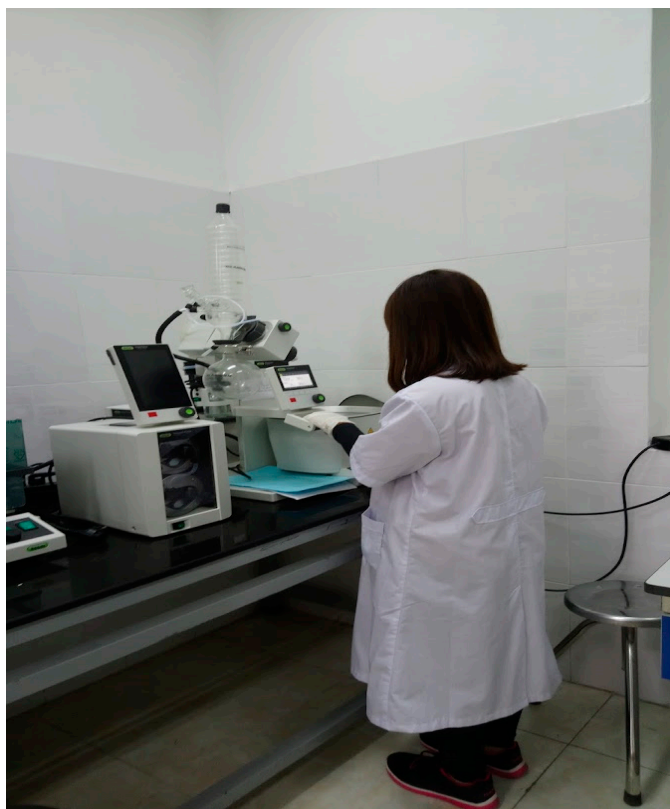

Figure S9: The sample after Soxhlet extraction may have a large volume, therefore it needs to reduce the sample volume by vacuum rotary evaporation to remove excess extraction solvent before cleaning through the chromatography column

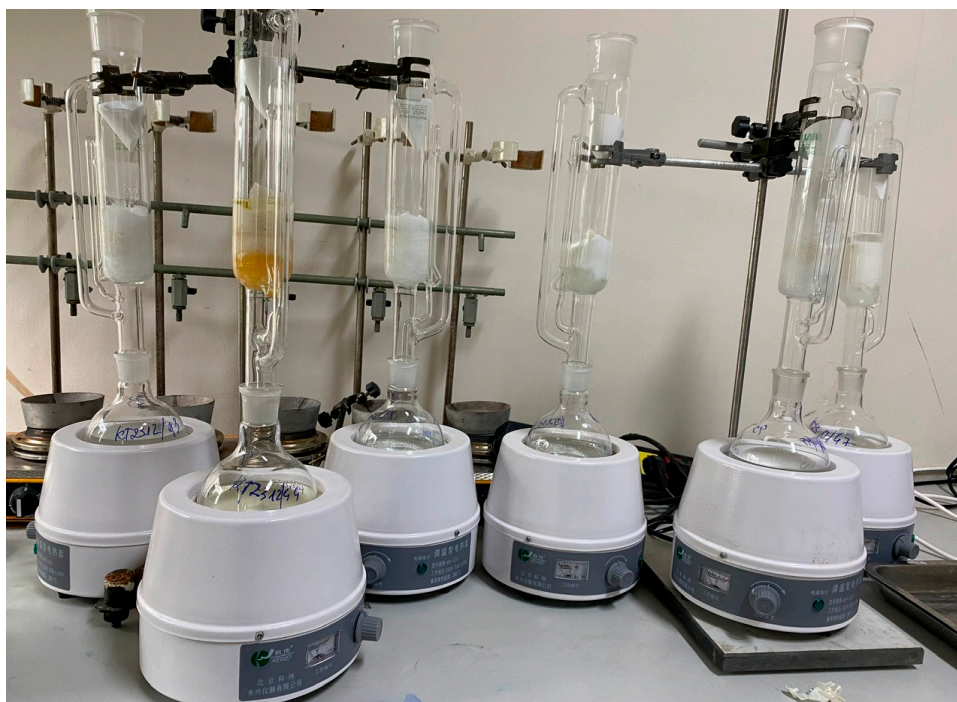

Figure S10: The sample is placed into the Soxhlet extraction apparatus and extracted for 16 hours using a mixture of 300mL DCM:Hexane (1:4) to ensure complete separation of dioxin compounds from the sample

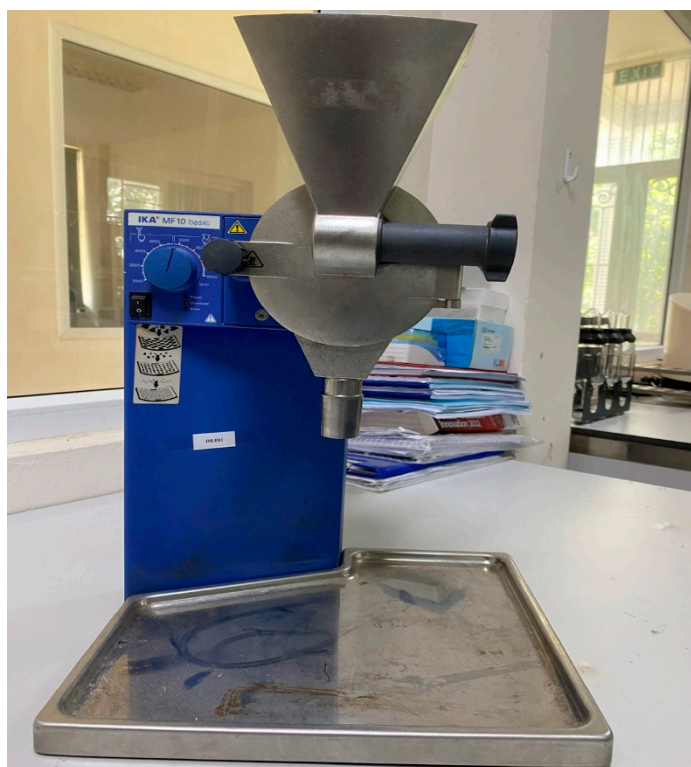

Figure S11: The sediment sample, approximately 100 (g), which has been cleaned and dried, is finely ground and sieved using the IKA MF 10 Basic grinding device

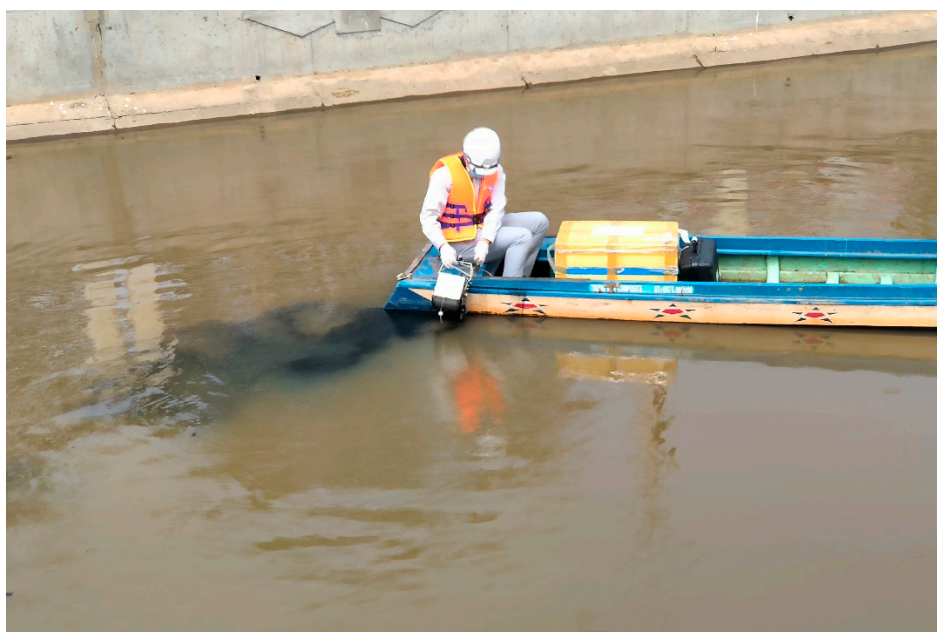

Figure S12: An Ekman grab was utilized for sediment sampling from the river
